# Supplementary material
Source: bioRxiv or medRxiv preprint supplement (https://www.biorxiv.org/highwire/filestream/37536/field_highwire_adjunct_files/0/126383-1.pdf)
Supplement: Supplementary file [file 126383-1.pdf]

## **Supplementary File**

### **Title:**

Biologics-associated Risks for Incident Skin and Soft Tissue Infections in Psoriasis Patients: Results from Propensity Score-Stratified Survival Analysis

### **Authors:**

Su-Hsun Liu,<sup>a,b</sup> Tsung-Han Hsieh,<sup>c</sup> Leslie Y Chen,<sup>a,d</sup> Yu-Chering Huang,<sup>a,e</sup> Yu-Huei Huang<sup>a,f,g\*</sup>

### **Affiliations:**

- a. College of Medicine, Chang Gung University, 259 Wen-hwa 1<sup>st</sup> Road, Gueishan District, Taoyuan City, Taiwan 333
- b. Department of Family Medicine, Chang Gung Memorial Hospital at Linkou, 5 Fusin Street, Gueishan District, Taoyuan City, Taiwan 333
- c. Department of Laboratory Medicine, Chang Gung Memorial Hospital at Linkou, 5 Fusin Street, Gueishan District, Taoyuan City, Taiwan 333
- d. Department of Medical Research and Development, Chang Gung Memorial Hospital at Linkou, 5 Fusin Street, Gueishan District, Taoyuan City, Taiwan 333
- e. Department of Pediatrics, Chang Gung Memorial Hospital at Linkou, 5 Fusin Street, Gueishan District, Taoyuan City, Taiwan 333
- f. Department of Dermatology, Chang Gung Memorial Hospital at Taipei, 199 Dunhua North Road, Taipei City, Taiwan 105
- g. Department of Dermatology, Chang Gung Memorial Hospital at Linkou, 5 Fusin Street, Gueishan District, Taoyuan City, Taiwan 333

### **Corresponding author:**

Dr. Yu-Huei Huang; Email: huangyh@adm.cgmh.org.tw

**Content:**

Supplementary Figures S1-S3; Tables S1-S2

**Figure S1.** Cumulative probabilities of incident SSTIs in adult psoriasis patients (N=922) visiting Dermatology Clinic in 2010-2015, by quintile bins of propensity score on receiving biologics regimen.

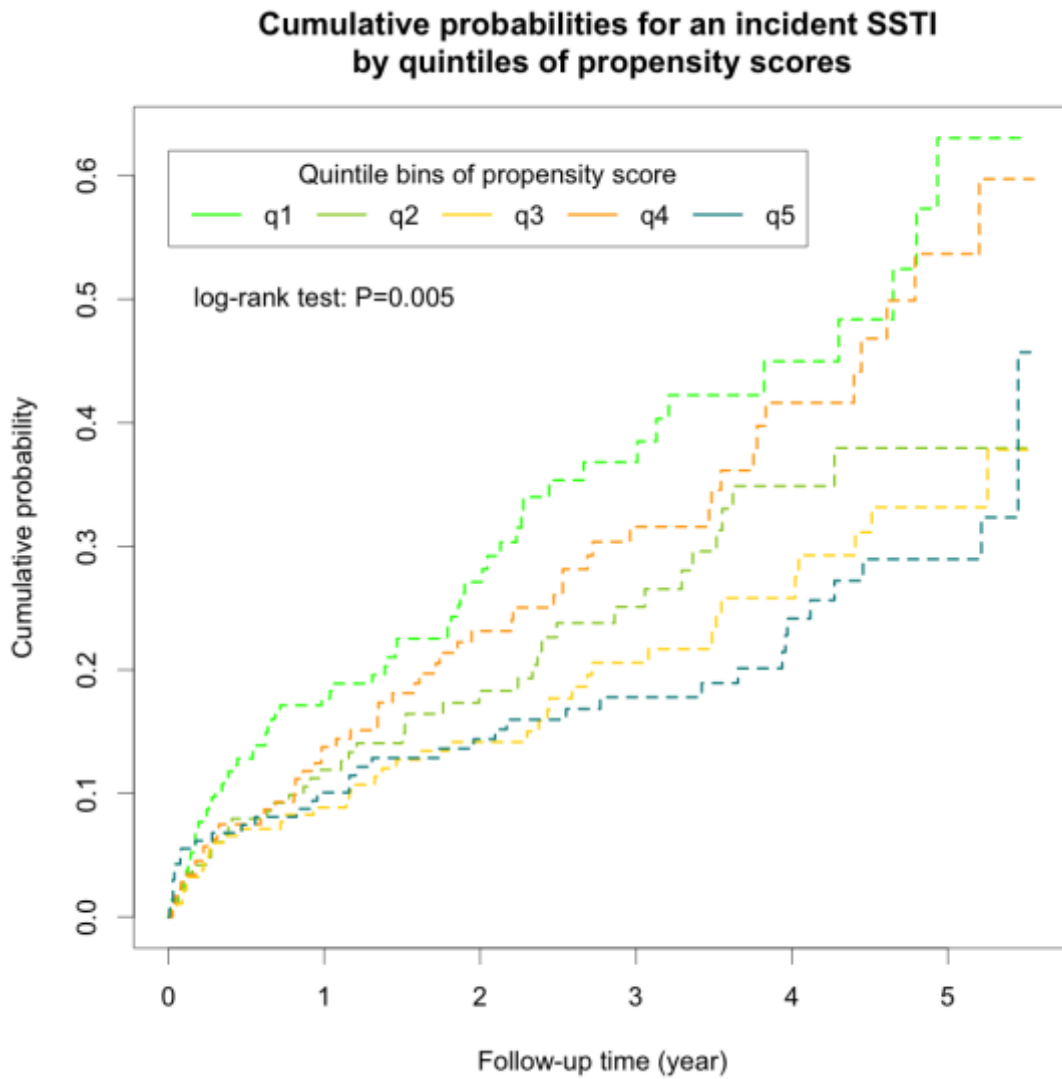

Figure S2.

**Comparing propensity scores (PS) on receiving biologics between biologics users vs. nonusers by quantile bins**

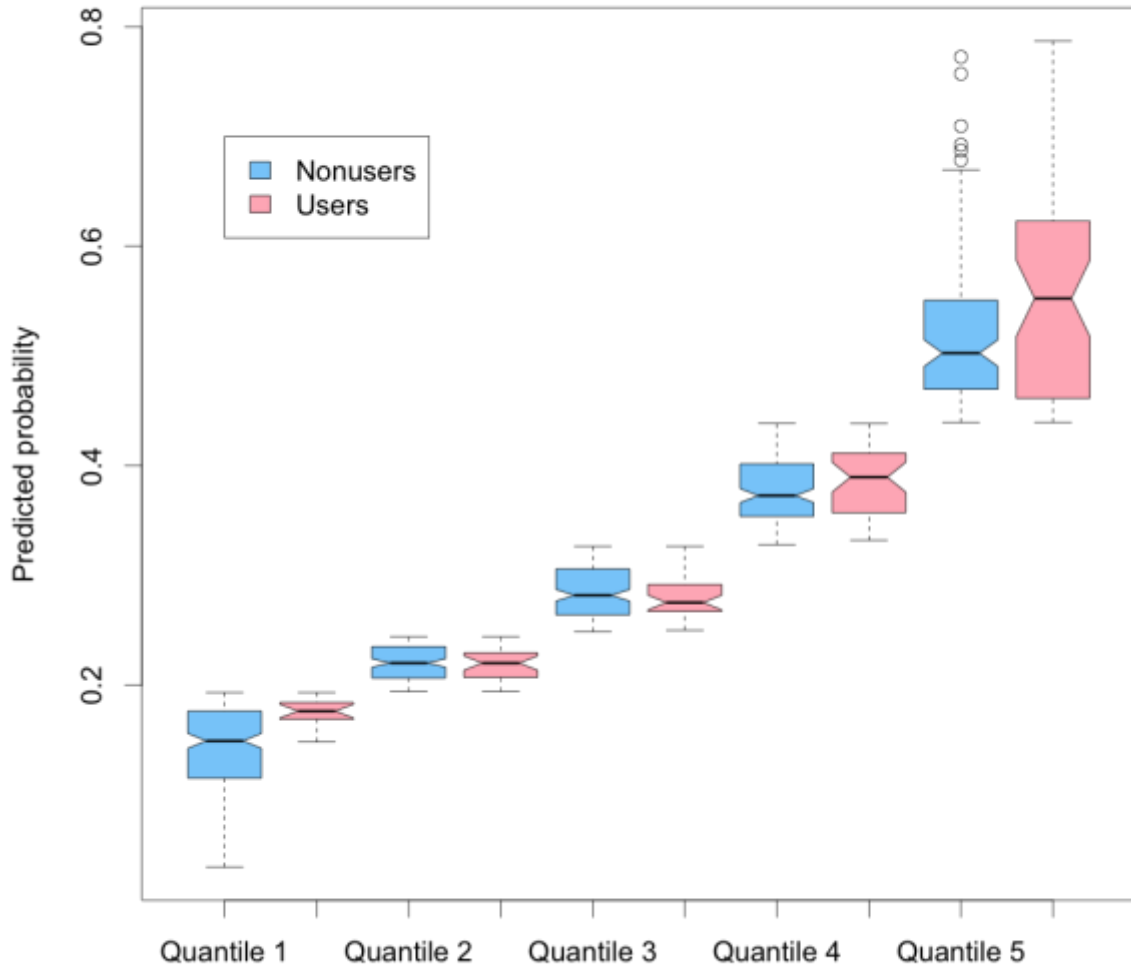

Figure S3.

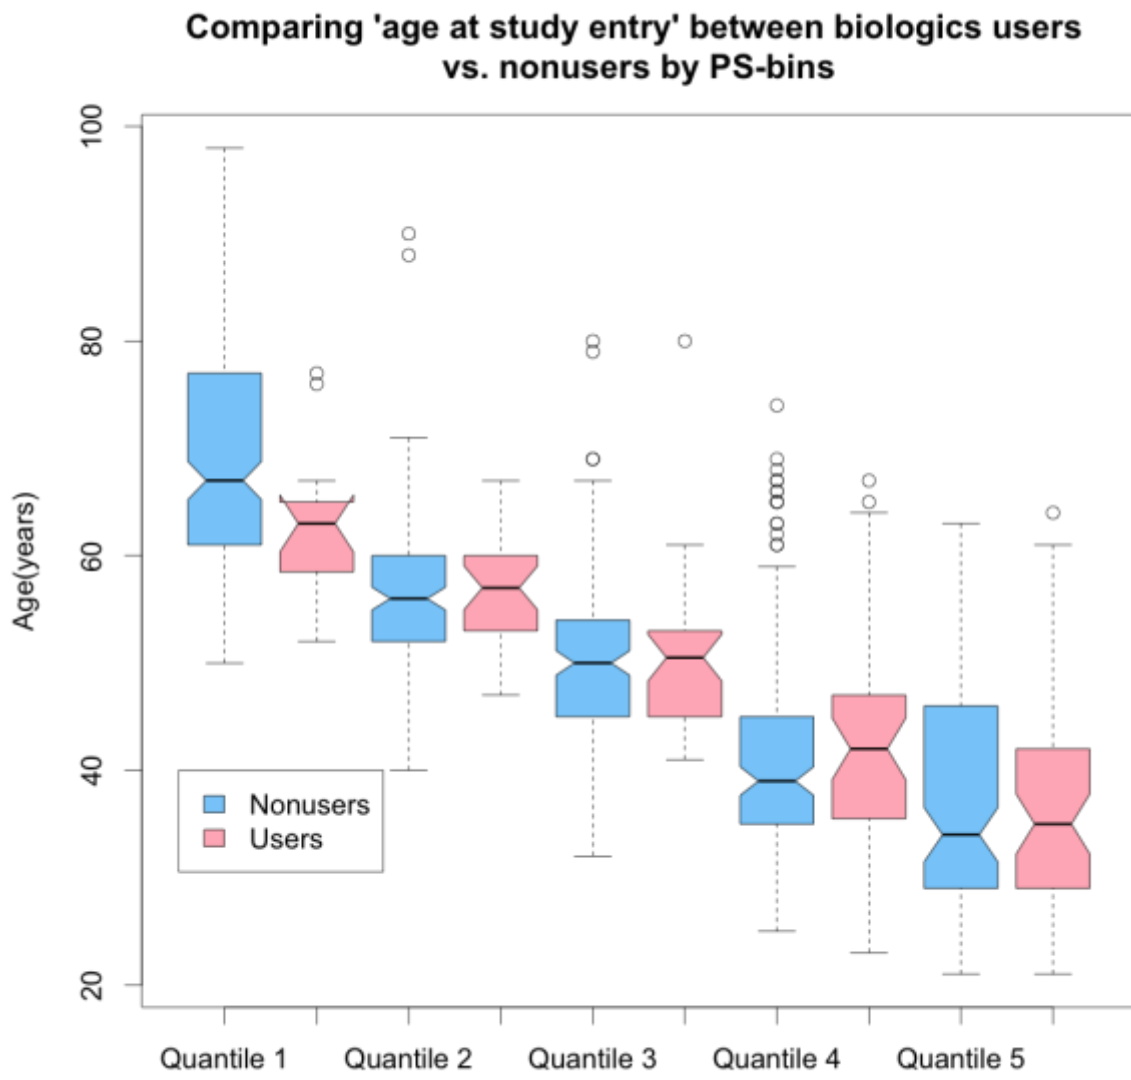

**Table S1.** Characteristics of adult psoriasis patients who were not at risks for incident SSTIs at follow-up in 2010-2015 (N=37)

| At study entry, N (%)            | Not at-risk | P value <sup>a</sup> |
|----------------------------------|-------------|----------------------|
| Age (year), Median (IQR)         | 53 (38-58)  | 0.539                |
| Age group (year)                 |             |                      |
| 20-40                            | 10 (27.0%)  | 0.972                |
| 40-65                            | 22 (59.5%)  |                      |
| ≥ 65                             | 5 (13.5%)   |                      |
| Male                             | 22 (59.5%)  | 0.155                |
| Calendar year at study entry     |             |                      |
| 2010                             | 18 (48.6%)  | 0.166                |
| 2011                             | 2 (5.4%)    |                      |
| 2012                             | 5 (13.5%)   |                      |
| 2013                             | 10 (27.0%)  |                      |
| 2014                             | 2 (5.4%)    |                      |
| Arthropathy diagnosis            | 3 (8.1%)    | 0.464                |
| Steroid use                      |             |                      |
| None                             | 3 (8.1%)    | 0.045                |
| Topical only                     | 31 (83.8%)  |                      |
| Low dose                         | 0 (0.0%)    |                      |
| Medium dose                      | 3 (8.1%)    |                      |
| No. steroid in use, Median (IQR) | 2 (2-3)     | 0.043                |

a. P value for ranksum test for nominal variables and for chi-square or Fisher's exact test for categorical variables comparing to at-risk patients in Table 1

**Table S2.** Types of incident SSTIs and the corresponding ICD-9-CM codes documented in 922 at-risk adult psoriasis patients followed at Dermatology Clinic, 2010-2015

| Type               | No. incident (%) | ICD-9-CM codes (no. events)                                          |
|--------------------|------------------|----------------------------------------------------------------------|
| Abscess            | 97 (41.6%)       | 681.0; 682.0, 682.2, 682.3, 682.4, 682.5, 682.6, 682.7, 682.8, 682.9 |
| SSTI others        | 115 (49.4%)      | 686.00, 686.8, 686.9                                                 |
| Carbuncle/furuncle | 15 (6.4%)        | 680.2, 68.05, 680.8, 680.9                                           |
| Decubitus ulcer    | 3 (1.3%)         | 707.0, 707.8, 707.9                                                  |
| SSI                | 3 (1.3%)         | 998.59, 996.66                                                       |

Abbreviation: SSI, surgical site infection; SSTI, skin and soft tissue infection; no., number
